# Supplementary material for: Density functional theory study of hydrogenation of S to H2S on Pt–Pd alloy surfaces
Source: Royal Society of Chemistry journal article supplement (doi:10.1039/c5ra20087c), 2016-01-01
Supplement: c5ra20087c1.pdf [file c5ra20087c1.pdf]

Electronic Supporting Information

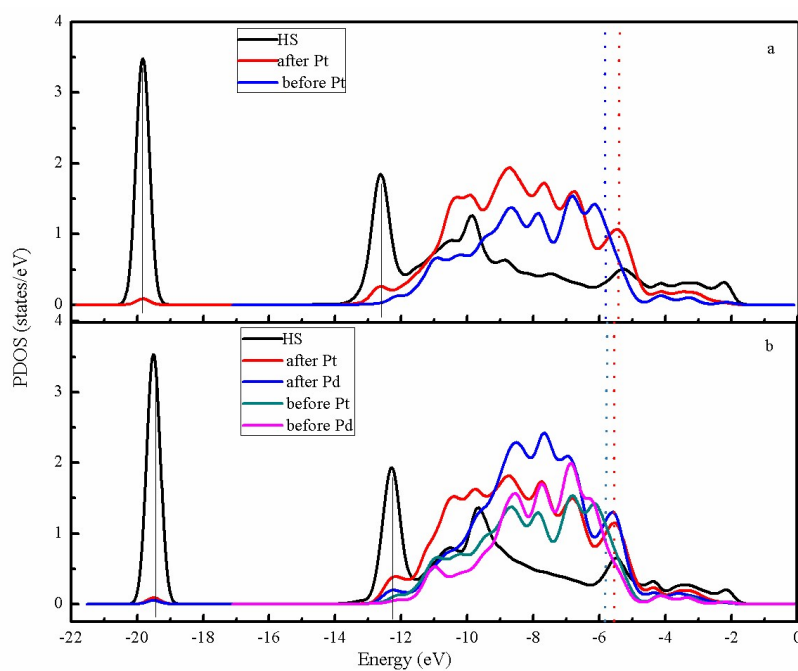

Fig. S1. PDOS of HS adsorption on Pt-1Pd(111): (a) HS at the B<sub>1</sub> site, (b) HS at the B<sub>2</sub> site.

**S + H → HS**

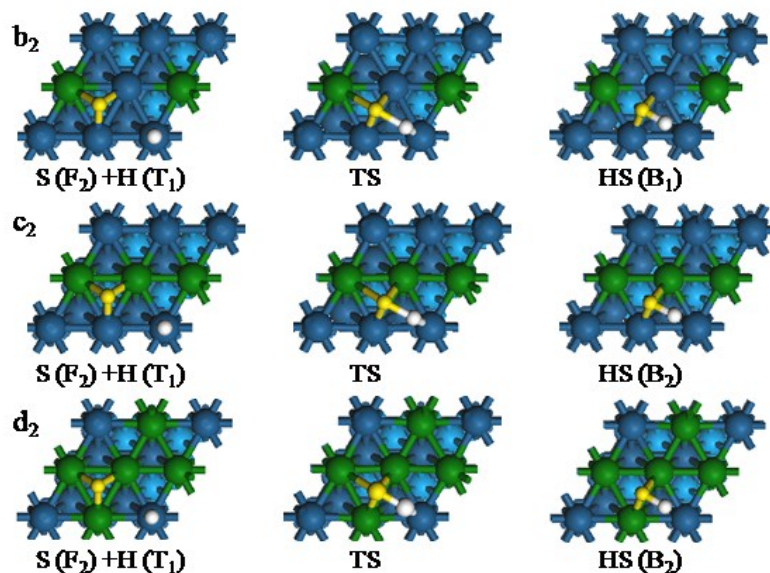

Fig. S2 The structures of the initial, transition and final states for S+H→HS path(II) reaction. (b<sub>2</sub>) On Pt-1Pd(111), (c<sub>2</sub>) On Pt-2Pd(111), (d<sub>2</sub>) On Pt-3Pd(111).

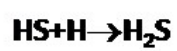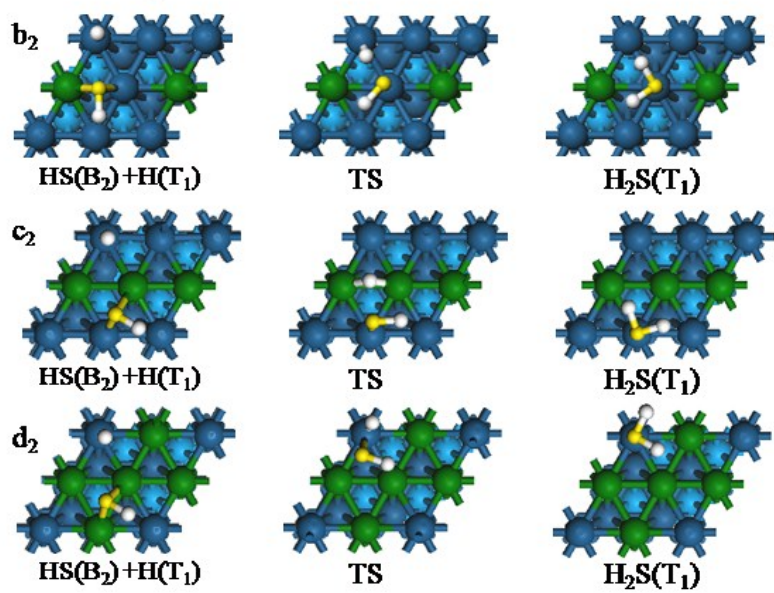

Fig. S3 The structures of the initial, transition and final states for HS+H→H<sub>2</sub>S path(II) reaction. (b<sub>2</sub>) On Pt-1Pd(111), (c<sub>2</sub>) On Pt-2Pd(111), (d<sub>2</sub>) On Pt-3Pd(111).

Table S1. The imaginary frequency of the transition states in the different reaction

| reaction                                    | imaginary frequency(cm <sup>-1</sup> ) |
|---------------------------------------------|----------------------------------------|
| Pt                                          |                                        |
| S + H → HS                                  | -991                                   |
| HS + H → H <sub>2</sub> S                   | -361                                   |
| Pt-1Pd                                      |                                        |
| S(F <sub>1</sub> ) + H → HS                 | -908                                   |
| HS (B <sub>1</sub> ) + H → H <sub>2</sub> S | -598                                   |
| S(F <sub>2</sub> ) + H → HS                 | -1089                                  |
| HS (B <sub>2</sub> ) + H → H <sub>2</sub> S | -167                                   |
| Pt-2Pd                                      |                                        |
| S(F <sub>1</sub> ) + H → HS                 | -911                                   |
| HS (B <sub>1</sub> ) + H → H <sub>2</sub> S | -133                                   |
| S(F <sub>2</sub> ) + H → HS                 | -876                                   |
| HS (B <sub>2</sub> ) + H → H <sub>2</sub> S | -296                                   |
| Pt-3Pd                                      |                                        |
| S(F <sub>1</sub> ) + H → HS                 | -875                                   |
| HS (B <sub>1</sub> ) + H → H <sub>2</sub> S | -397                                   |
| S(F <sub>2</sub> ) + H → HS                 | -853                                   |
| HS (B <sub>2</sub> ) + H → H <sub>2</sub> S | -997                                   |
| Pt-4Pd                                      |                                        |
| S + H → HS                                  | -740                                   |
| HS + H → H <sub>2</sub> S                   | -1233                                  |
| Pd                                          |                                        |
| S + H → HS                                  | -750                                   |
| HS + H → H <sub>2</sub> S                   | -1017                                  |
